# Supplementary material for: Preparation of Fe/CuFe2O4 embedded in porous carbon composites for removal of tetracycline from aqueous solution
Source: Royal Society of Chemistry journal article supplement (doi:10.1039/d4nj00266k), 2024-01-01
Supplement: d4nj00266k1.pdf [file d4nj00266k1.pdf]

1 **Appendix A Supplementary data**

2

3 **Preparation of Fe/CuFe<sub>2</sub>O<sub>4</sub> embedded in porous carbon composites for removal of**  
4 **tetracycline from aqueous solution**

5

6 Menghe Liu<sup>ab</sup>, Congyang Zou<sup>\*ab</sup>, Yong Wang<sup>a</sup>, Zhuyou Zhou<sup>ab</sup>, Yufeng Ji<sup>ab</sup>

7

8

9 a. School of Environmental Science and Engineering, Suzhou University of Science and  
10 Technology, Suzhou 215009, Jiangsu, China

11 b. Institute of Ecological Environment Carbon Neutrality, Suzhou University of Science and  
12 Technology, Suzhou 215009, Jiangsu, China

13

14

15

16 -----

17 \* Corresponding authors. E-mails: ericcongyang @126.com (C. Zou).

18

19

20

## 21 **Text S1.Synthesis process of two precursors and FC materials**

22 Fe-MOF was prepared by a simple solvothermal method. Firstly, 1 mol of  $\text{FeCl}_3 \cdot 6 \text{H}_2\text{O}$   
23 (2.70g) was dissolved in 15 mL N,N-dimethylformamide (DMF) solution, and then 15 mL  
24 DMF solution containing 5 mmol  $\text{H}_2\text{BDC}$  (0.830 g) was gradually added under ultrasonic  
25 mixed thoroughly for 20 min. The precursor solution was transferred into a 100 mL Teflon-  
26 lined stainless- steel autoclave and place it in the temperature controlled oven at 110 degree  
27 celsius for 24 h. After the temperature was cooled to room temperature, the resulting  
28 precipitates were collected by centrifugation, washed by ethanol and deionized water three  
29 times and dried under vacuum at 65 degree celsius for 12 h. Fe-MOF is the precursor material  
30 of Fe-MOF@C. Fe-MOF@C nanocomposite was prepared by annealing the sample powder in  
31 a tube furnace at 700 degree celsius in flowing  $\text{N}_2$  for 2 h (heating rate: 5 degree celsius  
32  $\text{min}^{-1}$ ). The preparation process of Fe-Cu-MOF as the precursor material of FCC is shown in  
33 **Fig. 1.**

## 34 **Text S2. FCC/PS System Adaptation Experiment**

35 The degradation of sulfamethoxazole (SMX) by FCC/PS system was studied to further  
36 explore the general applicability of FCC nanocatalyst to other antibiotics. A series of  
37 experimental results showed that the degradation rate of SMX by FCC/PS system reached about  
38 99% in 60 minutes when the dosage of FCC nano-catalyst was 0.2g/L, the dosage of PS was  
39 1mmol/L, the initial concentration of SMX was 10mg/L, and the pH value of solution was  
40 neutral. See **Fig. S6.** for details.

## 41 **Text S3. TOC analysis**

42 The total organic carbon (TOC) of tetracycline (TC) before and after advanced oxidative  
43 degradation was measured using a TOC-L analyzer (TOC-L cph , shimadzu, China) in order to  
44 investigate the mineralization efficiency. The mineralization efficiency of TC was calculated  
45 using the following equation:

$$46 \text{ Mineralization efficiency (\%)} = (1 - \text{TOC}_t / \text{TOC}_0) \times 100\%$$

47 where  $\text{TOC}_0$  and  $\text{TOC}_t$  are the TOC values of the target TC in samples solution before  
48 degradation and at the degradation time t, respectively.

49

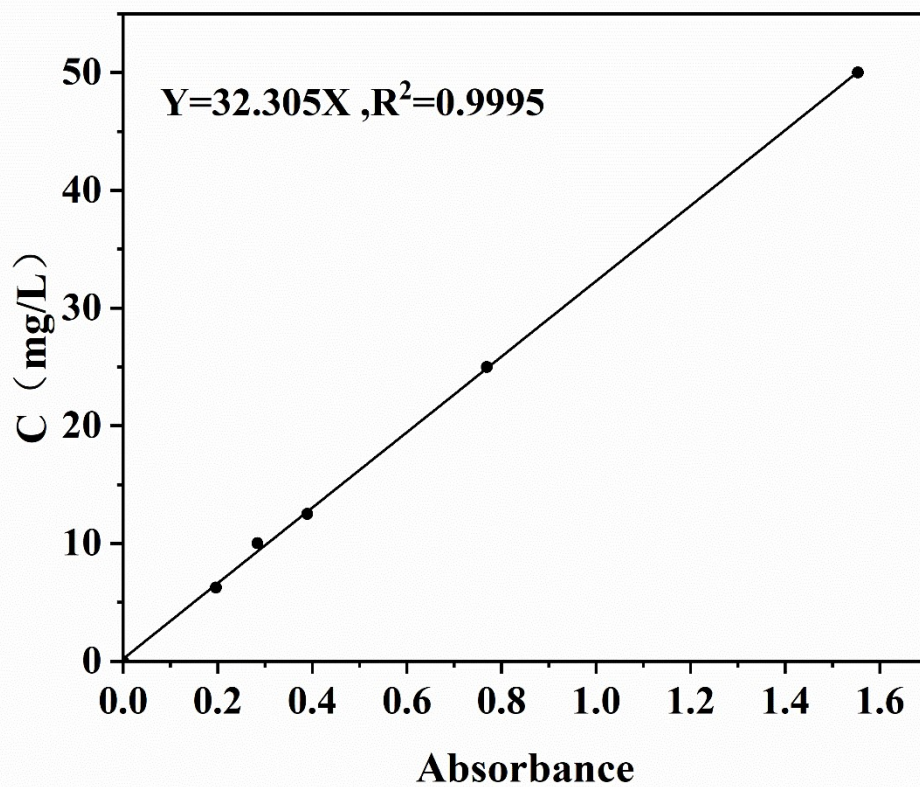

50

51 **Figure S1** The corresponding calibration curve of TC (6.25, 10. 0, 12.5, 25.0, and 50.0 mg/L,  
52 respectively).

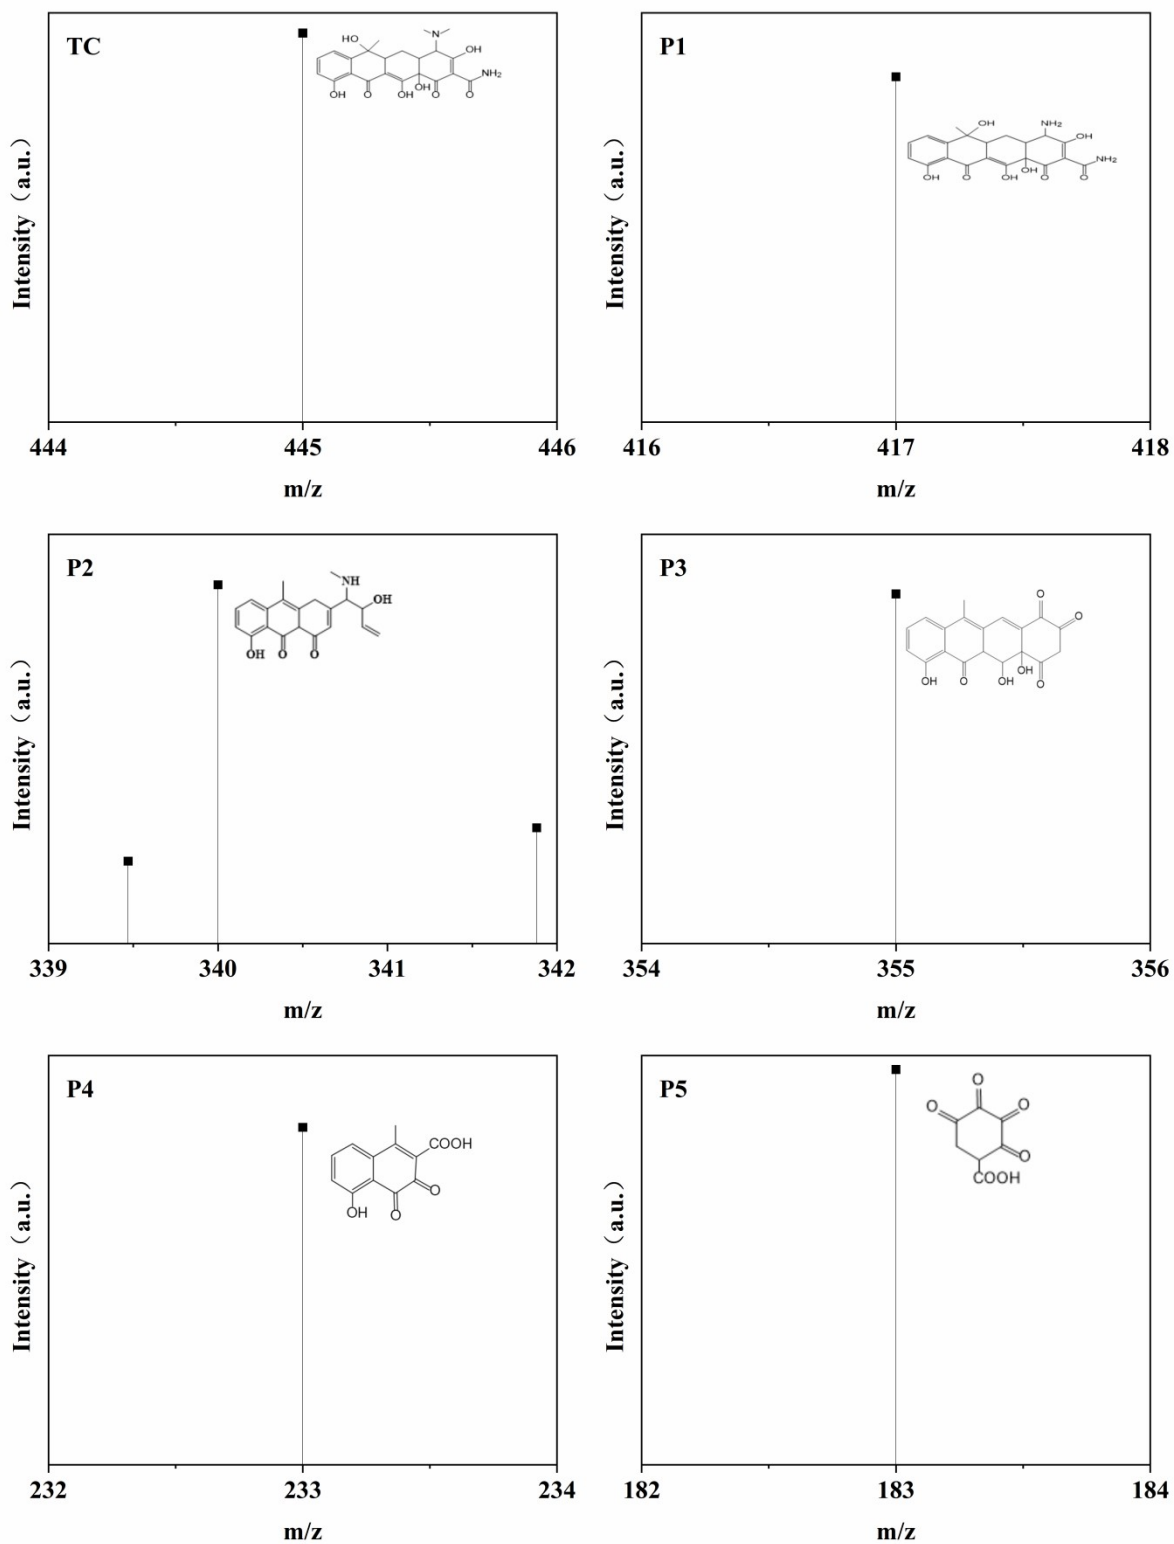

54

55 **Figure S2** Typical MS fragments (m/z) of main intermediates detected by LC-MS during TC  
 56 advanced oxidation degradation.

57

58

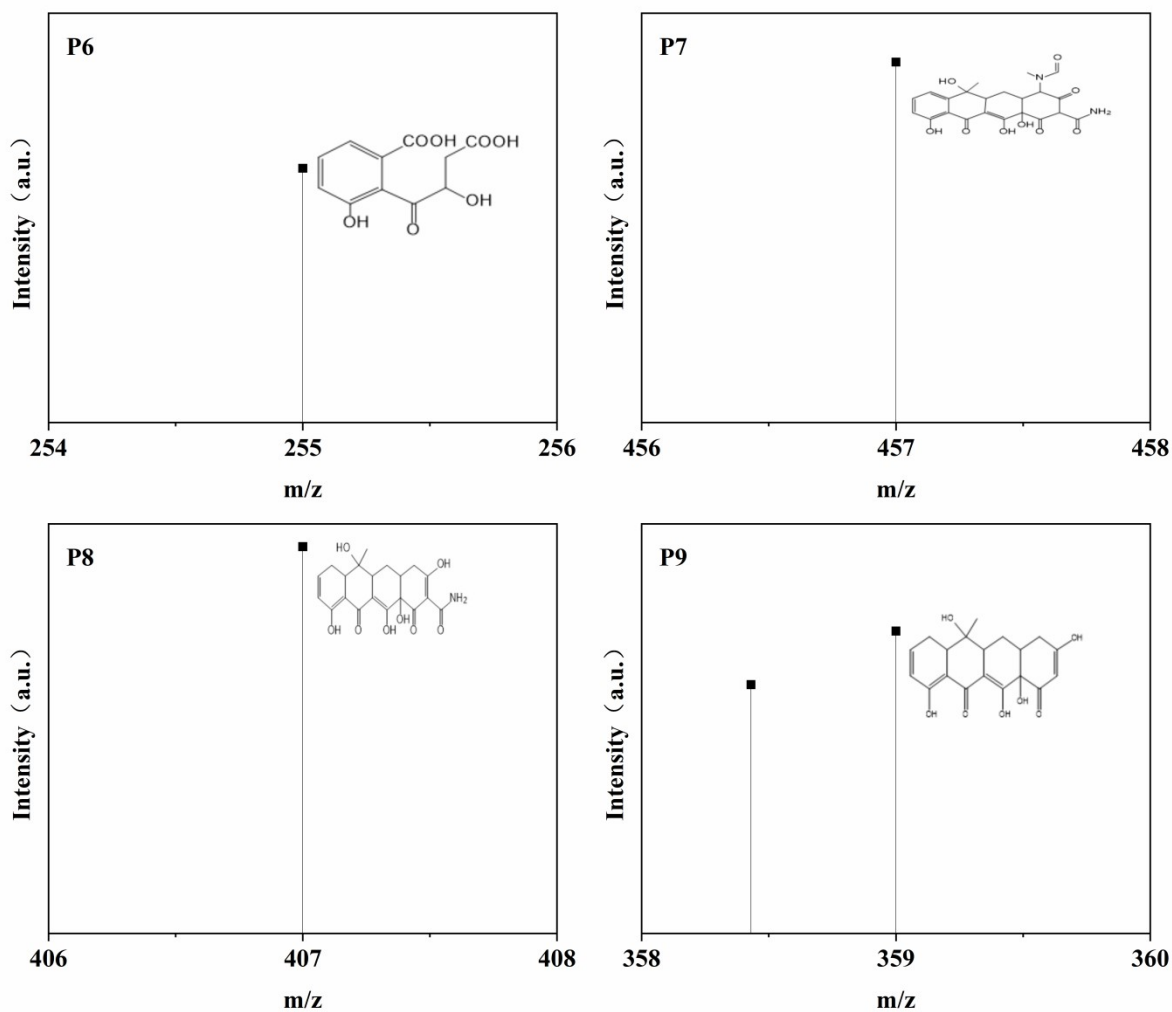

59  
60  
61  
62

**Figure S3** Typical MS fragments (m/z) of main intermediates detected by LC-MS during TC advanced oxidation degradation.

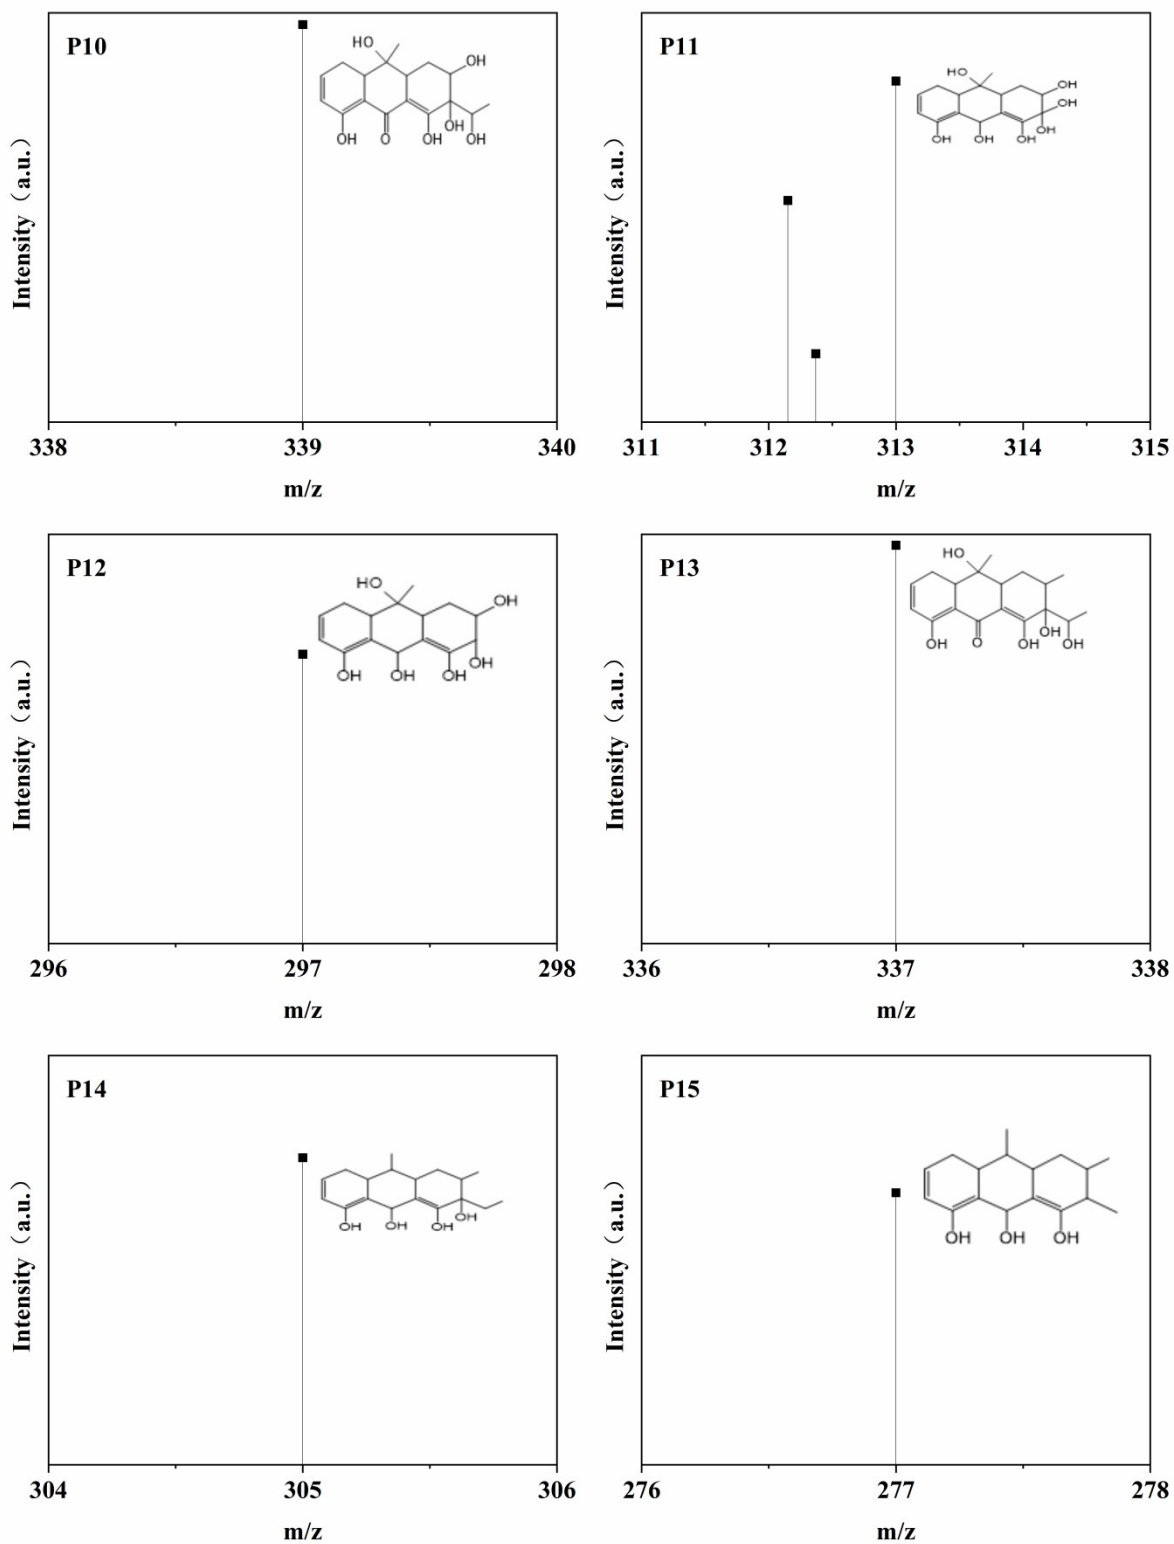

63  
 64 **Figure S4** Typical MS fragments (m/z) of main intermediates detected by LC-MS during TC  
 65 advanced oxidation degradation.

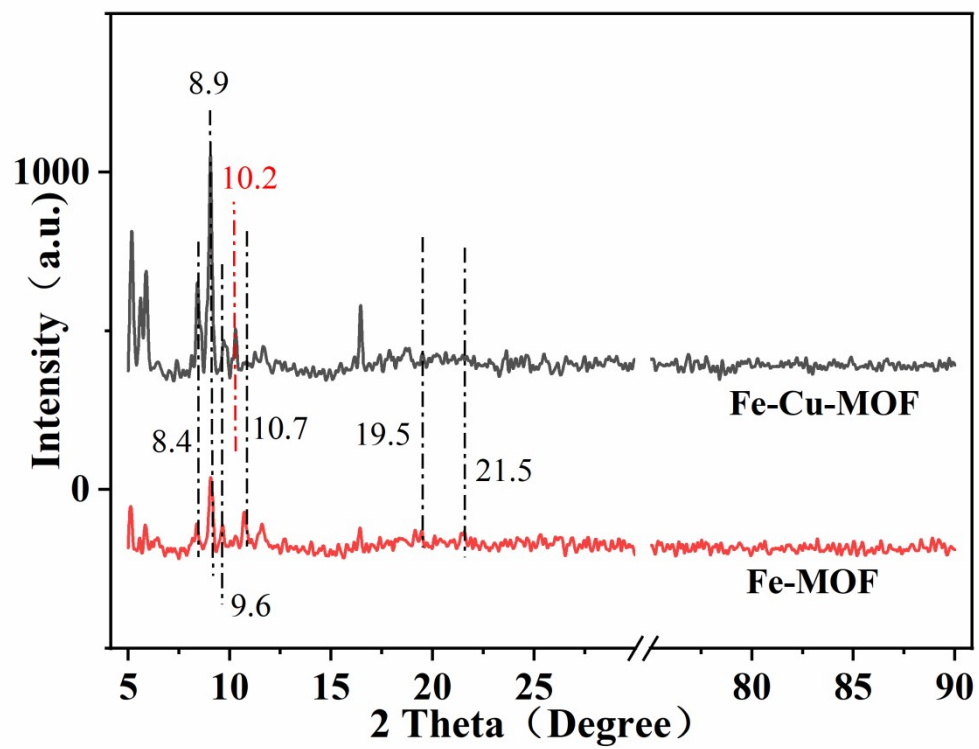

66

67

68

**Figure S5** Amplified XRD pattern of Fe-MOF and Fe-Cu-MOF.

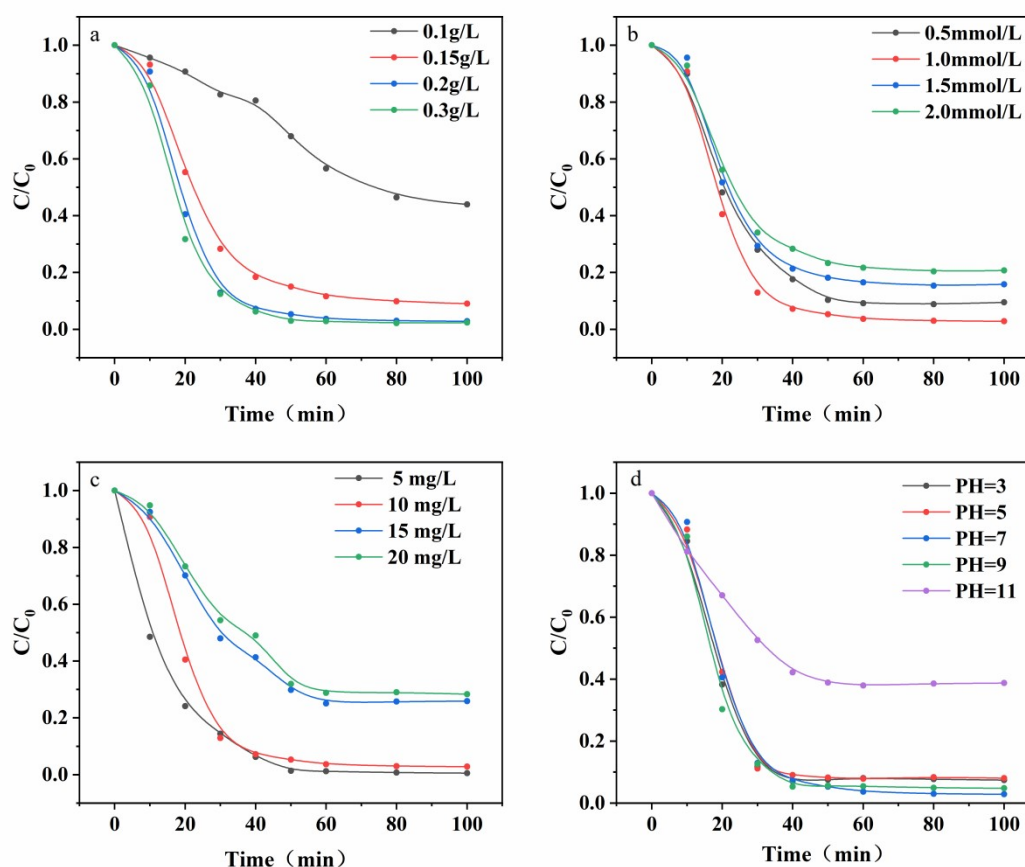

70

71 **Figure S6** (a) Effect of catalyst dosage on the SMX removal by FCC (initial pH = 7.0, [PS] =

72 1 mmol/L, [SMX] = 10 mg/L, temperature = 25 °C). (b) Effect of PS concentration on the

73 SMX removal by FCC (initial pH = 7.0, [catalyst dosage] = 0.2 g/L, [SMX] = 10 mg/L,

74 temperature = 25 °C). (c) Effect of SMX concentration on the SMX removal by FCC (initial

75 pH = 7.0, [catalyst dosage] = 0.2 g/L, [PS] = 1 mmol/L, temperature = 25 °C). (d) Effect of pH

76 on the SMX removal by FCC (initial [catalyst dosage] = 0.2 g/L, [PS] = 1 mmol/L, [SMX] =

77 10 mg/L, temperature = 25 °C). (e) Effect of inorganic ions on the SMX removal by FCC

78 (initial pH = 7.0, [PS] = 1 mmol/L, [SMX] = 10 mg/L, temperature = 25 °C, [catalyst dosage]

79 = 0.2 g/L).



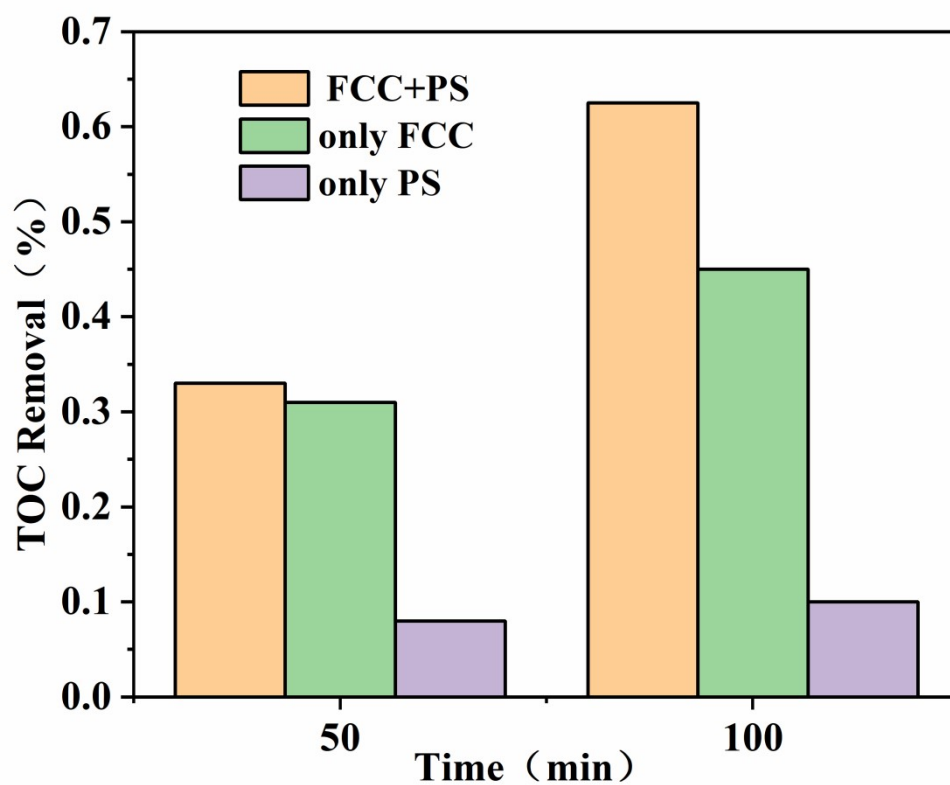

80  
81  
82  
83  
84

**Fig. S7.** Removal efficiency of TOC after advanced oxidative degradation of TC in FCC/PS system.

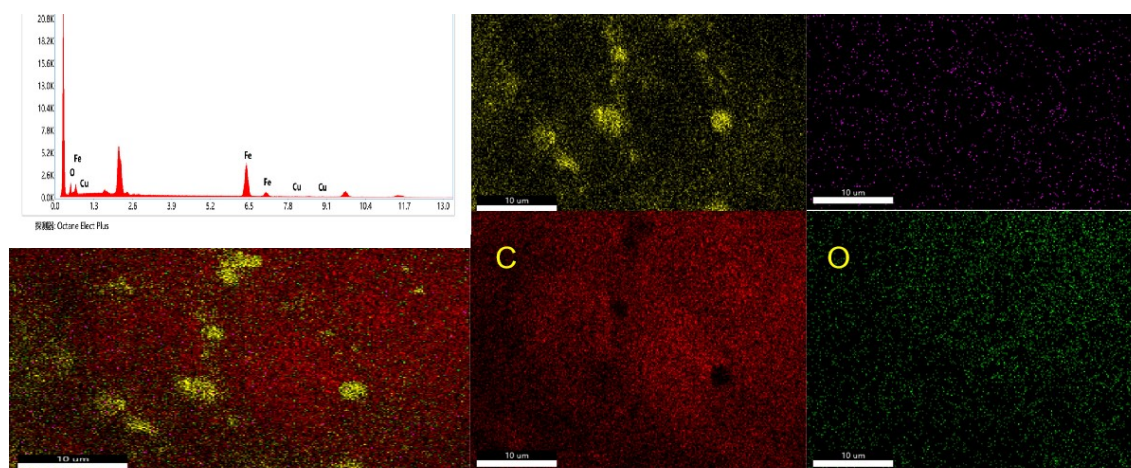

85  
86  
87  
88

**Fig. S8.** EDAX and elemental mapping images of Fe, Cu, C, O in-plane

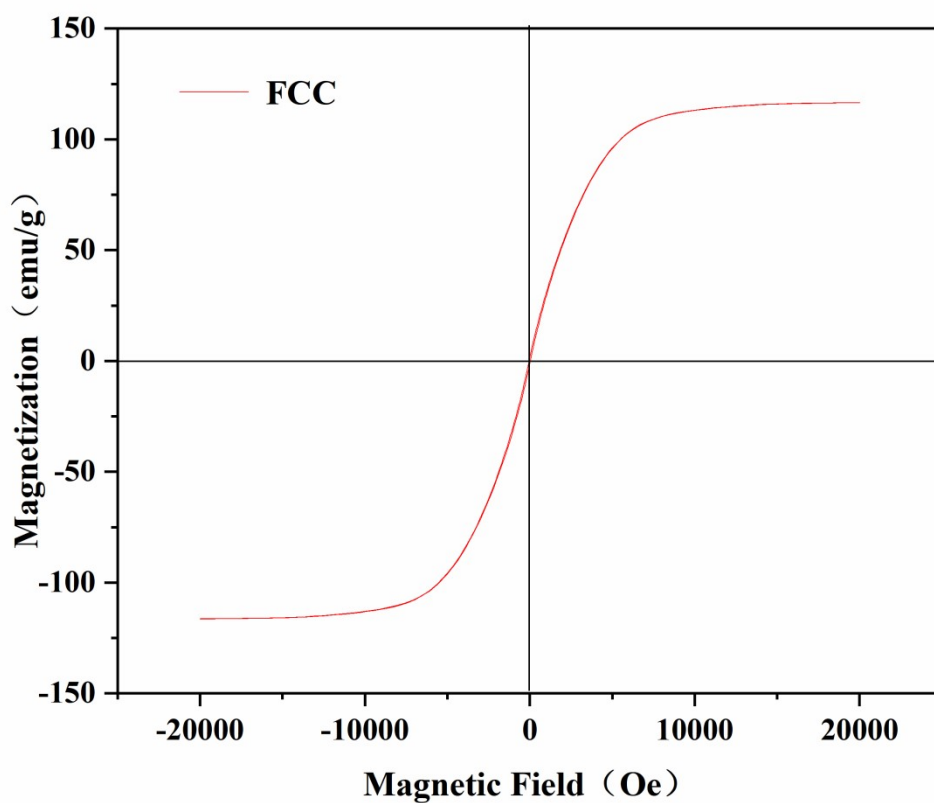

89  
90

**Fig. S9.** The hysteresis curve of FCC.

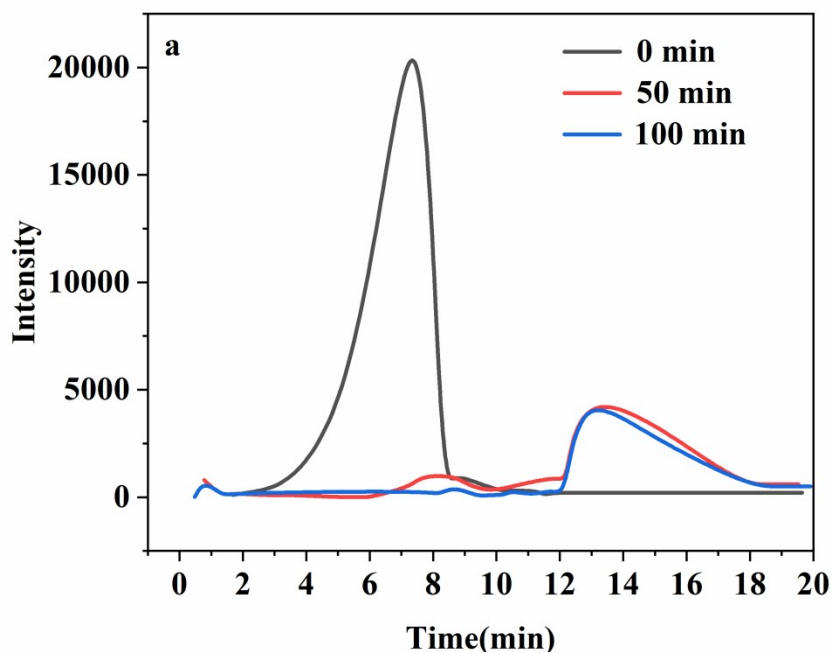

91  
92  
93  
94

**Fig. S10.** Typical HPLC-UV chromatography of TC degraded by FCC/PS system (0, 50, 100min).

Sample 646 Vial 1:B,6 ID File LMH-1 Date 02-Aug-2023 Time 17:32:39 Description Default file

1: MS ES+ :TIC

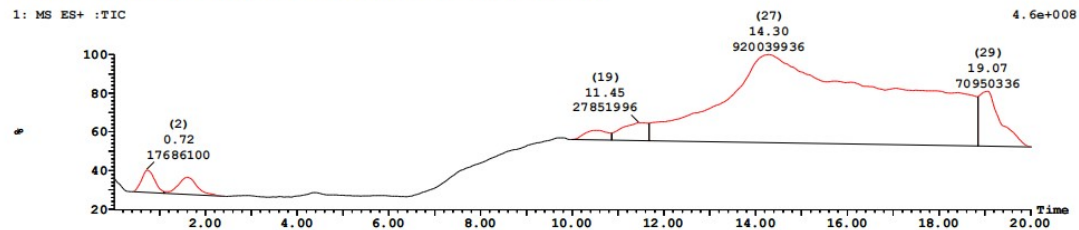

Sample 647 Vial 1:B,7 ID File LMH-2 Date 02-Aug-2023 Time 17:54:42 Description Default file

1: MS ES+ :TIC

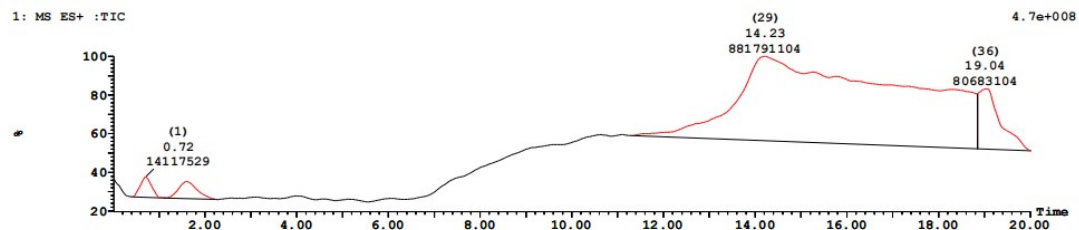

Sample 650 Vial 1:B,10 ID File LMH-5 Date 02-Aug-2023 Time 19:01:00 Description Default file

1: MS ES+ :TIC

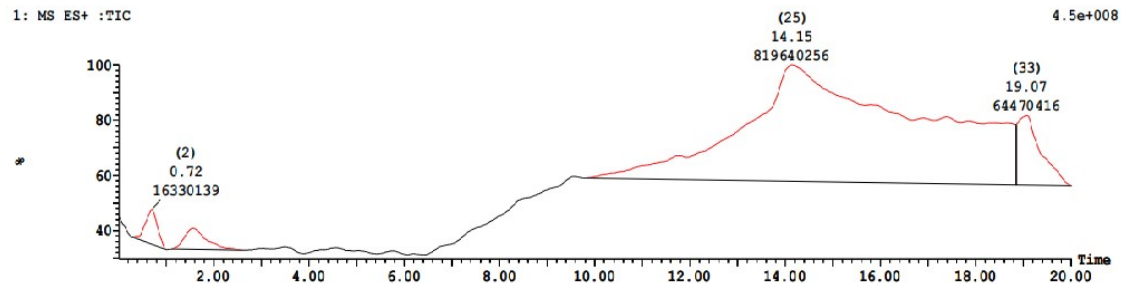

95

96

97 **Fig. S11.** TIC chromatogram of TC degraded by FCC/PS system.

98 **Table S1** Comparison of the fabricated MOF-derived FCC with the other reported materials  
 99 for removal of pollutants  
 100

| Materials                                                          | Pollutant (mg/L) | Time (min) | Products                            | Removal efficiency | Referencev |
|--------------------------------------------------------------------|------------------|------------|-------------------------------------|--------------------|------------|
| FCC                                                                | TC (50)          | 100        | CO <sub>2</sub><br>H <sub>2</sub> O | 98%                | This work  |
| KPCN/GO/ZnFe <sub>2</sub> O <sub>4</sub>                           | RhB (10)         | 90         | CO <sub>2</sub>                     | 96%                | 1          |
|                                                                    | TC (35)          | 120        | H <sub>2</sub> O                    | 87%                |            |
| OSGCN                                                              | SMX (10)         | 60         | CO <sub>2</sub><br>H <sub>2</sub> O | 99%                | 2          |
| BiOCl/Bi <sub>12</sub> O <sub>17</sub> Cl <sub>2</sub>             | BPA (10)         | 240        | CO <sub>2</sub>                     | 73. 3%             | 3          |
|                                                                    | TCH (10)         |            | H <sub>2</sub> O                    | 62. 5%             |            |
| WO <sub>3</sub> /Bi <sub>12</sub> O <sub>17</sub> Cl <sub>2</sub>  | TCH (20)         | 60         | CO <sub>2</sub><br>H <sub>2</sub> O | 94%                | 4          |
| WO <sub>3</sub> /Bi <sub>24</sub> O <sub>31</sub> Cl <sub>10</sub> | TCH (35)         | 60         | CO <sub>2</sub><br>H <sub>2</sub> O | 80%                | 5          |

101  
 102  
 103  
 104  
 105  
 106  
 107  
 108

**Table S2** Comparison of the fabricated MOF-derived FCC with the other reported materials  
 for removal of pollutants

| Materials                                              | Surface Area (m <sup>2</sup> /g) | IUPAC classification | Referencev |
|--------------------------------------------------------|----------------------------------|----------------------|------------|
| FCC                                                    | 167.51                           | IV curve             | This work  |
| GCN/CuFe <sub>2</sub> O <sub>4</sub> /SiO <sub>2</sub> | 192.42                           | IV curve             | 6          |
| CdS@MoS 2 –5%                                          | 17.35                            | IV curve             | 7          |
| BiOIO <sub>3</sub> /BiOBr                              | 3.40                             | IV curve             | 8          |
| EG-CuFe <sub>2</sub> O <sub>4</sub> -U                 | 34.99                            | IV curve             | 9          |

110  
 111  
 112  
 113  
 114  
 115  
 116  
 117  
 118

## 119 References

- 120 1. R. Kumar, A. Sudhaik, Sonu, P. Raizada, V.-H. Nguyen, Q. Van Le, T. Ahamad, S. Thakur, C. M. Hussain  
121 and P. Singh, *Chemosphere*, 2023, 337, 139267.
- 122 2. V. Hasija, P. Singh, S. Thakur, V.-H. Nguyen, Q. Van Le, T. Ahamad, S. M. Alshehri, P. Raizada, B. M.  
123 Matsagar and K. C. W. Wu, *Chemosphere*, 2023, 320, 138015.
- 124 3. L. Hao, H. Huang, Y. Guo, X. Du and Y. Zhang, *Appl Surf Sci*, 2017, 420, 303-312.
- 125 4. J. Zheng, F. Chang, M. Jiao, Q. Xu, B. Deng and X. Hu, *J Colloid Interf Sci*, 2018, 510, 20-31.
- 126 5. C.-Y. Wang, X. Zhang, X.-N. Song, W.-K. Wang and H.-Q. Yu, *Acs Appl Mater Inter*, 2016, 8, 5320-5326.
- 127 6. Sonu, V. Dutta, A. Sudhaik, A. A. P. Khan, T. Ahamad, P. Raizada, S. Thakur, A. M. Asiri and P. Singh,  
128 *Materials Research Bulletin*, 2023, 164, 112238.
- 129 7. K. Sharma, A. Kumar, T. Ahamad, Q. V. Le, P. Raizada, A. Singh, L. H. Nguyen, S. Thakur, V.-H. Nguyen  
130 and P. Singh, *Journal of Materials Science & Technology*, 2023, 152, 50-64.
- 131 8. X. Kuang, M. Fu, H. Kang, P. Lu, J. Bai, Y. Yang and S. Gao, *Optical Materials*, 2023, 138, 113690.
- 132 9. S. Liu, Y. Liu, M. Chen, L. Li, W. Tu and Z. Huang, *Chem Eng J*, 2022, 433, 133516.
- 133
